# Supplementary material
Source: publisher figshare collection journal article supplement (https://acs.figshare.com/ndownloader/files/9846847)
Supplement: Supplementary file 1 [file 9846847]

90
XYZ file generated by gabedit : coordinates in Angstrom
N          1.4062910000         43.5074700000         35.3842500000
C          0.6384870000         43.7558340000         34.1494710000
H          0.2137150000         42.7964480000         33.8158470000
C          1.5261780000         44.3430990000         33.0317510000
C          0.7024890000         44.7412980000         31.7878330000
H          0.2096680000         43.8590860000         31.3522900000
H         -0.0738710000         45.4763670000         32.0476440000
H          1.3484790000         45.1942350000         31.0257170000
C          2.3687030000         45.5181550000         33.5725860000
O          2.7538260000         46.4457800000         32.8473000000
N          2.7081150000         45.4397480000         34.9070410000
H          3.3516920000         46.1852820000         35.2889010000
C          2.3296120000         44.4395570000         35.8412620000
O          2.8233470000         44.4242410000         36.9720730000
O          6.4522830000         54.5782270000         39.2462800000
H          6.1128610000         54.1168040000         38.4466730000
C          6.1317290000         53.7843440000         40.4074860000
H          5.0367210000         53.6767340000         40.5360600000
H          6.5161700000         54.3400410000         41.2776730000
C          6.7788610000         52.3878370000         40.4169910000
H          6.5686710000         51.9118640000         41.3994190000
O          6.2236740000         51.5906240000         39.3399650000
C          7.1805130000         50.4978660000         39.0247630000
H          6.8842430000         49.6022310000         39.5926680000
N          7.0662340000         50.1431680000         37.6356980000
C          7.2903370000         51.1162690000         36.5096450000
H          7.1270010000         52.1521250000         36.8298950000
N          6.3164820000         50.7231240000         35.4306000000
C          5.7452440000         49.4837260000         35.8866330000
C          4.8703630000         48.5930370000         35.2498030000
N          4.3292770000         48.8240860000         34.0058550000
H          4.8452040000         49.4500490000         33.3926670000
H          3.8357470000         48.0456490000         33.5536500000
N          4.4727480000         47.4736530000         35.9391070000
C          4.9237870000         47.2949820000         37.1931820000
H          4.5636420000         46.3946790000         37.6981960000
N          5.7720640000         48.0905540000         37.8860250000
C          6.1650790000         49.1709190000         37.1853910000
C          8.3137130000         52.3812450000         40.1924950000
H          8.5819230000         53.2292170000         39.5424700000
C          8.5803210000         51.0261350000         39.4724880000
H          9.2571550000         51.1357360000         38.6143030000
H          9.0446310000         50.3250110000         40.1806080000
O          8.9661830000         52.5117690000         41.4834450000
O          5.1382060000         53.7059390000         36.6905620000
O          4.0535850000         56.3218870000         35.1316290000
O          2.7978090000         54.6114940000         33.2024990000
C          3.9559870000         54.5782670000         36.7893700000
C          3.8074880000         53.1341050000         37.0963330000
C          3.3687740000         55.1052930000         35.4947500000
C          3.1113780000         52.2318330000         36.1309750000
C          3.4618960000         54.0407410000         34.3715170000
C          2.8515320000         52.7047140000         34.8149030000
C          2.6078150000         50.9631510000         36.5481690000
C          1.7524060000         50.2257200000         35.6532540000
C          2.0587930000         51.9587430000         33.9421240000
C          1.4783540000         50.7356340000         34.3405250000
C          1.1585230000         48.9916000000         36.0701530000
C          2.9103270000         50.3699250000         37.8319420000
C          1.4428020000         48.4563960000         37.3720170000
C          0.2628330000         48.2882720000         35.1919810000
C          0.6084840000         49.9907970000         33.4677730000
C          2.3584330000         49.1766150000         38.2179320000
C          0.0209210000         48.8233550000         33.8773920000
C          0.8276590000         47.2505650000         37.7714300000
C         -0.3554830000         47.1034000000         35.6516940000
C         -0.0745900000         46.5937810000         36.9249340000
H          4.0099590000         55.2999100000         37.6120120000
H          3.7874110000         52.8420140000         38.1458320000
H          2.2915370000         55.3064960000         35.6843390000
H          4.5338130000         53.9029080000         34.1487240000
H          1.8413970000         52.3515540000         32.9486130000
H          3.6675080000         56.5957960000         34.2757740000
H          3.6271600000         50.8521920000         38.4956050000
H          3.3388370000         54.4012430000         32.4209380000
H          0.4190940000         50.3825020000         32.4661360000
H          2.6263720000         48.7450850000         39.1840060000
H         -0.6450330000         48.2766550000         33.2058360000
H          1.0638930000         46.8307210000         38.7504530000
H         -1.0635180000         46.5887220000         34.9977030000
H         -0.5565530000         45.6737810000         37.2603480000
H         -0.2127750000         44.4364880000         34.3493550000
H          2.2608280000         43.5669520000         32.7441960000
H          8.3214420000         51.0051480000         36.1314650000
H          5.5914020000         51.4430670000         35.3269200000
H          9.8180960000         52.9612450000         41.3405420000
C          0.8395580000         42.5515860000         36.3497240000
H          0.6910470000         41.5767020000         35.8611040000
H         -0.1343810000         42.8980650000         36.7419960000
H          1.5347800000         42.4410460000         37.1874260000
 
